# Supplementary material for: Novel peapoded Li4Ti5O12 nanoparticles for high-rate and ultralong-life rechargeable lithium ion batteries at room and lower temperatures
Source: Royal Society of Chemistry journal article supplement (doi:10.1039/c5nr08399k), 2015-12-15
Supplement: c5nr08399k1.pdf [file c5nr08399k1.pdf]

# Novel Peapoded $\text{Li}_4\text{Ti}_5\text{O}_{12}$ Nanoparticles for High-rate and Ultralong-life Rechargeable Lithium Ion Batteries at Room and Lower Temperature

Liang Peng, Huijuan Zhang, Ling Fang, Yan Zhang, Yu Wang\*

*The State Key Laboratory of Mechanical Transmissions and School of Chemistry and Chemical Engineering, Chongqing University, Chongqing 400044, China*

E-mail: wangy@cqu.edu.cn; prospectwy@gmail.com

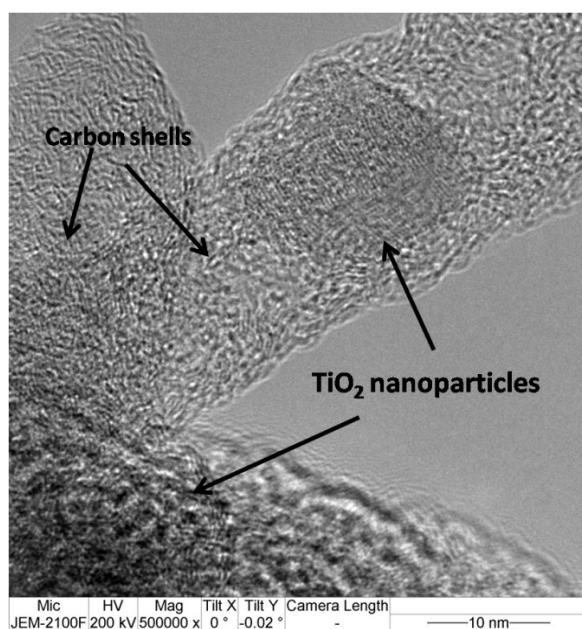

**Figure S1** low-resolution TEM image of the peapod-like  $\text{TiO}_2\text{-C}$  composite is introduced to display the specific structure.

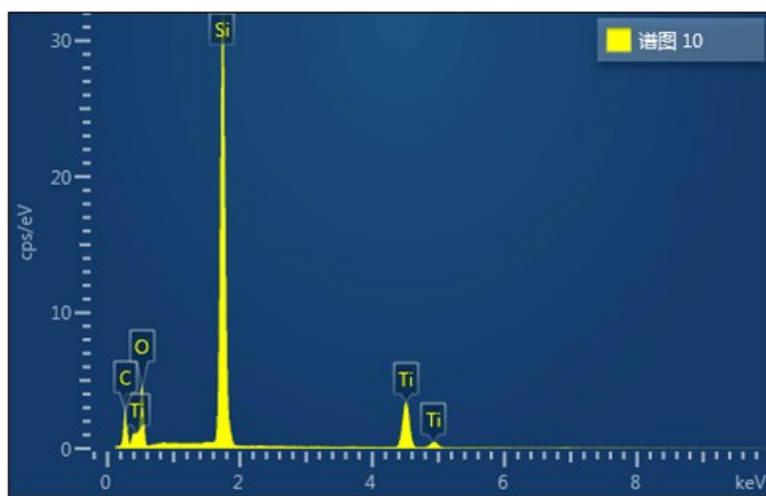

**Figure S2** The EDS spectrum of the NS-LTO-C composite.

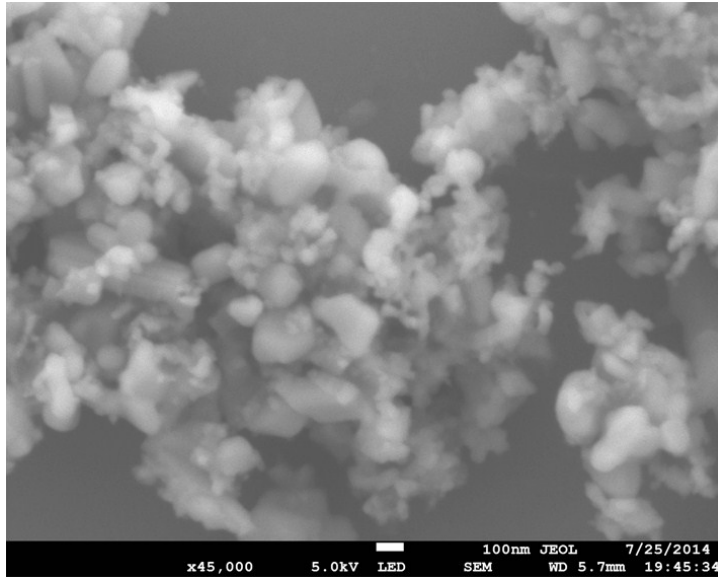

**Figure S3** SEM image is introduced to show the morphology of the MS-LTO composite.

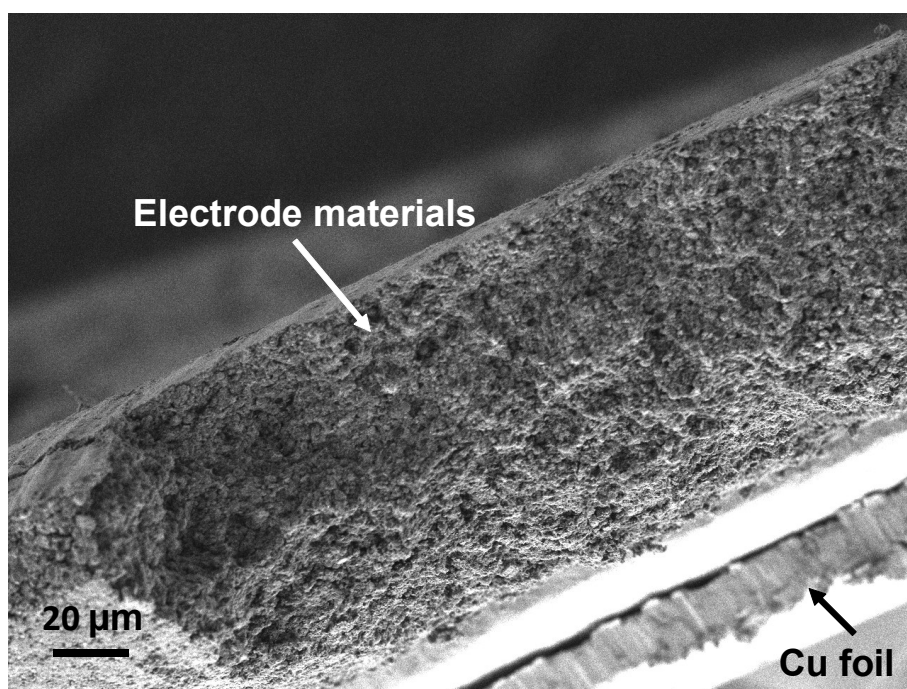

**Figure S4** A typical SEM image to reveal the thickness of electrode

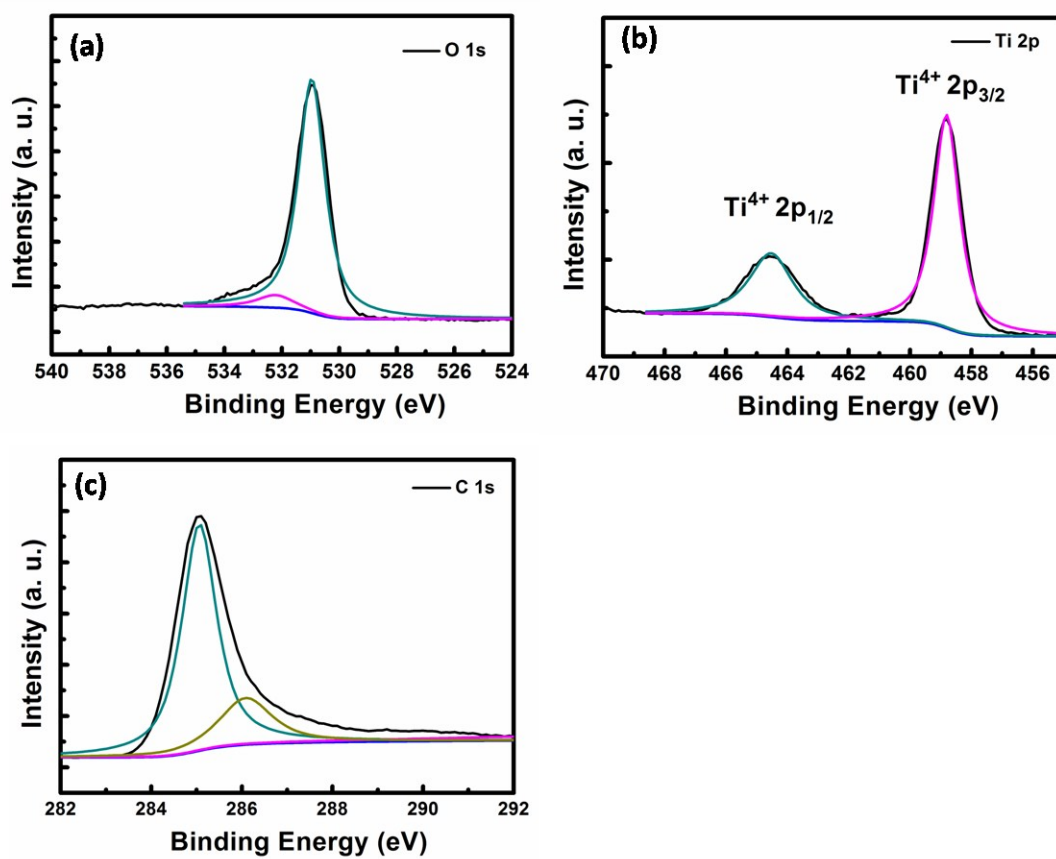

**Figure S5** XPS spectra of (a) O 1s, (b) Ti 2p, (c) C 1s regions of the NS-LTO-C composite.
